# Supplementary material for: Cellulose Carbamate Synthesis and Dissolution from Wheat Straw: Influence of Biomass Origin and Inorganic Removal Compared to Softwood Dissolving Pulps
Source: Research Square preprint supplement (doi:10.21203/rs.3.rs-7607724/v1), 2025-11-12
Supplement: Supplementary file 1 [file 55357354351246701f1b1940.docx]

**Supplementary Information**

**Cellulose Carbamate Synthesis and Dissolution from Wheat Straw: Influence of Biomass Origin and Inorganic Removal Compared to Softwood Dissolving Pulps**

*Ryen M. Fraziera, Mariana Lendewiga, Fernando Urdanetaa, Jorge Francoa, Jannatun Nayeema, Alfonso Domingueza, Ericka Fordb, Joel J. Pawlaka, Richard Vendittia, Orlando J. Rojasc,d,e, Ronalds Gonzaleza,**

*a*Department of Forest Biomaterials, North Carolina State University, Raleigh, NC 27695, USA.

*b* Department of Textile Engineering, Chemistry and Science, The Nonwovens Institute, North Carolina State University, Raleigh, NC 27695, USA.

*c* Bioproducts Institute, Department of Chemical & Biological Engineering, The University of British Columbia, Vancouver, BC Canada V6T 1Z3.

*d* Department of Wood Science, Faculty of Forestry, The University of British Columbia, 2900–2424 Main Mall Vancouver, BC Canada V6T 1Z4.

*e*Department of Chemistry, 2036 Main Mall. Vancouver, The University of British Columbia, Vancouver, BC Canada V6T 1Z1.

*Corresponding author, rwgonzal@ncsu.edu, Department of Forest Biomaterials, North Carolina State University, Raleigh, NC 27695, USA, phone number: 919-802-5219.

**S.1 ZnO / sodium hydroxide solvent preparation**

A 0.7% ZnO / 8% NaOH solution was prepared and left in a freezer overnight to cool to -10 to -5°C. To achieve this solution, first a 20% NaOH aqueous solution was mixed with the ZnO until transparent, then diluted with the remaining water to reach 8% NaOH.

Immediately after adding CC samples to the cold alkali, they were stirred using a vortex mixer for 1 minute, then placed in a freezer. After 30 minutes, the samples were stirred again for 1 minute on the vortex mixer, then placed into a freezer overnight. Agitation and freezing were repeated 24 hours later, for three more cycles, with 1 minute agitation time and 30-minute freezing time.

**S.2 Pulp fiber analysis**

**Table S.1** Fiber quality analysis of softwood and WS DPs, including fiber length, width, and fines content

| **DP** | **Length Weighted Fibers (mm)** | **Width Arithmetic (um)** | **Length Weighted % Fines** | **Arithmetic % Fines** |
| --- | --- | --- | --- | --- |
| **Softwood** | 0.546 | 23.5 | 38 | 65.5 |
| **WS PHK** | 0.283 | 18.9 | 53.5 | 75.9 |
| **WS PHK + EDTA** | 0.263 | 17.4 | 60 | 80.2 |


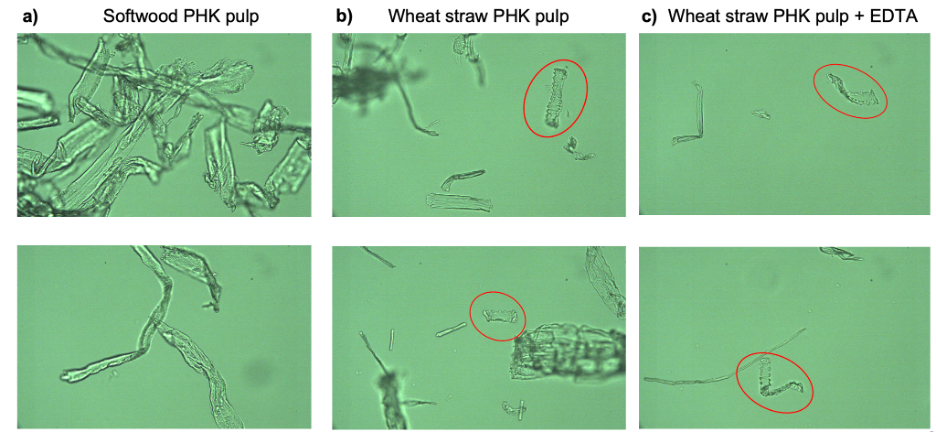


**Fig. S.1** Microscopic images of the a) softwood, b) WS, and c) WS + EDTA DPs prior to derivatization and dissolution. Epidermis cells are present in the WS pulps with and without EDTA

**Table S.2** Experimental results of softwood and WS carbamates

| **DP biomass** | **Pulping** | **Experiment (replicates)** | **Derivatization time (h)** | **Avg. DS** | **Soluble fraction (%) in %0.7 ZnO / 8% NaOH** |
| --- | --- | --- | --- | --- | --- |
| Softwood | PHK | 1S(1, 2, 3) | 0 | 0.07 +/- 0.04 | 85.3 +/- 0.92 |
| 1 | 0.17 +/- 0.02 | 86.9 +/- 1.95 |
| 2 | 0.29 +/- 0.10 | 90.4 +/- 2.04 |
| 4 | 0.46 +/- 0.06 | 87.5 +/- 1.34 |
| 6 | 0.86 +/- 0.16 | 75.0 +/- 6.20 |
| WS | PHK | 1W(1, 2, 3) | 0 | 0.03 +/- 0.01 | 82.2 +/- 0.85 |
| 1 | 0.09 +/- 0.01 | 89.6 +/- 1.23 |
| 2 | 0.17 +/- 0.01 | 91.3 +/- 2.06 |
| 4 | 0.43 +/- 0.18 | 81.1 +/- 4.67 |
| 6 | 0.76 +/- 0.20 | 77.9 +/- 4.15 |
| WS | PHK + EDTA | 2W(1, 2, 3) | 0 | 0.04 +/- 0.02 | 82.9 +/- 2.12 |
| 1 | 0.16 +/- 0.05 | 88.3 +/- 1.12 |
| 2 | 0.27 +/- 0.08 | 89.1 +/- 0.21 |
| 4 | 0.53 +/- 0.13 | 80.1 +/- 1.66 |
| 6 | 0.64 +/- 0.20 | 76.0 +/- 1.46 |

**Fig. S.2** FTIR Spectra of a) 1,3,5-Triazine-2,4,6-Triol (C3H3N3O3, Cyanuric Acid) and b) 1,3,5-Triazine (C3H3N3) (ChemicalBook, 2017a; ChemicalBook, 2017b)


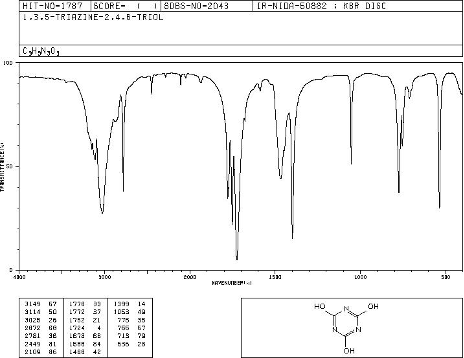

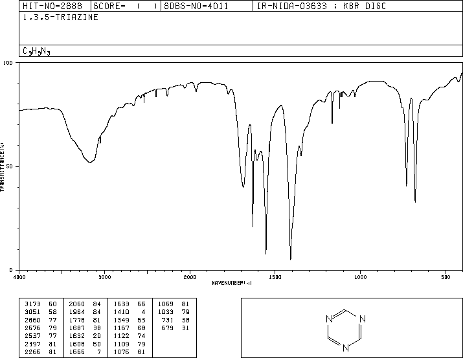


a)

b)

**S.3 References**

ChemicalBook, 2017a. 1,3,5-Triazine(290-87-9) IR1. https://www.chemicalbook.com/SpectrumEN_108-80-5_IR1.htm

ChemicalBook, 2017b. Cyanuric acid(108-80-5) IR1. https://www.chemicalbook.com/SpectrumEN_290-87-9_IR1.htm
